# Supplementary material for: Characterization and Functional Analysis of PEBP Family Genes in Upland Cotton (Gossypium hirsutum L.)
Source: PLoS One. 2016 Aug 23;11(8):e0161080. doi: 10.1371/journal.pone.0161080 (PMC4995033; doi:10.1371/journal.pone.0161080)
Supplement: S2 Table — (XLSX) [file pone.0161080.s007.xlsx]

## Sheet: Sheet2
Genes name	PCR Primers
GhFT up	ATGCCTAGAGACAGAGAT
GhFT down	TCATGTCCTACGGCCAC
GhTFL1 up	ATGTCAAGGGTCCCTGAGC
GhTFL1 down	TTATCTTCTTCTTGCAGCAGT
GhTFL2 up	ATGGCAAGGGAAGTAGAGC
GhTFL2 down	TCAACGTCTTCTTGCAGCTGT
GhTFL3 up	ATGGGAGAGCCTCTCATTG
GhTFL3 down	TTAGCGTCTCCTTGCAGCAG
GhTFL4 up	ATGGCAAAACTGTCAGATCC
GhTFL4 down	TTAGCGTCTTCTAGCAGCTGT
GhMFT1 up	ATGGCCCGGTCCGTTGAAC
GhMFT1 down	CTAACGTTTCTTAGCTGCTGG
GhMFT2 up	ATGGCTGCCTCCGTTGATC
GhMFT2 down	TCAACGCCTTCGGCTGACG
GhPEBP1 up	ATGGCTAGTGAGCAAGC
GhPEBP1 down	TTAAAACATGGTGGTCACTTGT
GhPEBP2 up	ATGGCTAGCGACCAAGATC
GhPEBP2 down	TTAAAACTTAGTCATCAATTCTG
Genes name	qRT-PCR Primers
GhFT up	CAGAGATCCTTTGGTTGTTGG
GhFT down	CCCTTGGTTGGTTAACAACTTG
GhTFL1 up	CCCAACAAACAAGTCGCCAA
GhTFL1 down	CTTCCCTCCCAAACGAAACA
GhTFL2 up	GGCAAGGGAAGTAGAGCCTC
GhTFL2 down	AGTTCTCATGTCACCTCCTG
GhTFL3 up	CCCAAGGCCAGATATAGGAA
GhTFL3 down	TGCAGCAGTTTCTCTTCGTG
GhTFL4 up	GGCAAAACTGTCAGATCCTC
GhTFL4 down	GAACCTCAACCTTAGGCTTG
GhMFT1 up	CGGCAGAGTGATCGGAGAT
GhMFT1 down	AGAAGGGATGGCCGAGAAT
GhMFT2 up	CTGCCTCCGTTGATCCTCTC
GhMFT2 down	GCTGGGACTTGGCGCATCAG
GhPEBP1 up	CTATTTGCTTTGGATGAGCAG
GhPEBP1 down	TTAAAACATGGTGGTCACTTG
GhPEBP2 up	GTTCAGGCTATTTGCTTTGGA
GhPEBP2 down	CATCAATTCTGCTTCCCCGAC
GhSOC1 up	AGCATGCAGTGGCAGCATCTGA
GhSOC1 down	TGGCTCTGACGCGGGTTACG
GhFD up	AGCTTAAATTCGGGTCCAG
GhFD down	AGCGGATTCACGGTTCTTA
Actin up	ATCCTCCGTCTTGACCTTG
Actin down	TGTCCGTCAGGCAACTCAT
Genes name	Promoter Primers
GhFT up	AAAATCAGCTACCCTACGTCCC
GhFT down	GGTTTACTGATCTGATCAACAC
GhPEBP2 up	ACTCTTTAGTTTAGTGGAAGAT
GhPEBP2 down	GTCGCTAGCCATTAACAACG
